# Supplementary material for: Microbially Synthesized Polymer-Metal Nanoparticles Composites as Promising Wound Dressings to Overcome Methicillin-Resistance Staphylococcus aureus Infections
Source: MDPI journal article supplement (doi:10.3390/polym15040920), 2023-02-12

Supplementary Material

**Figure S1.** Protocols tested to increase the yields of PHO biosynthesized from liquid culture of *P. putida* KT2440.

**Protocol #1: One-stage adapted from Escapa et al. 2011**

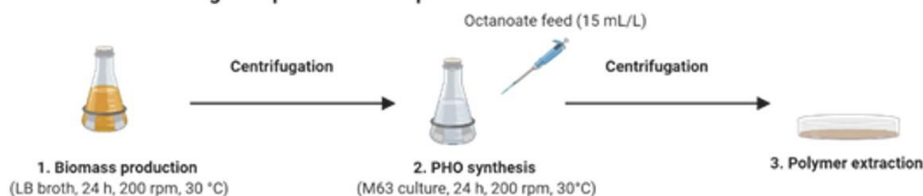

**Protocol #2: Two-stage adapted from Escapa et al. 2011**

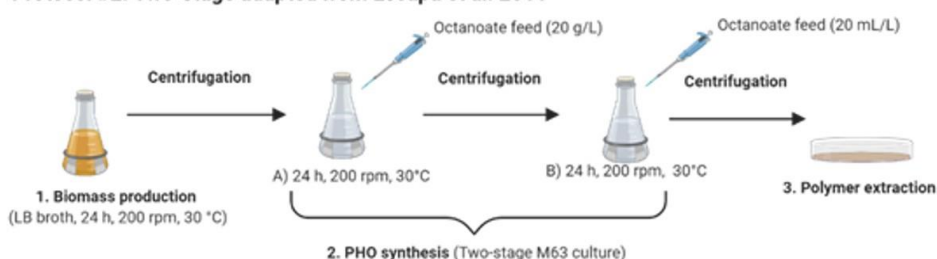

**Protocol #3: Adapted from Kim et al., 1997; Rai et al., 2011**

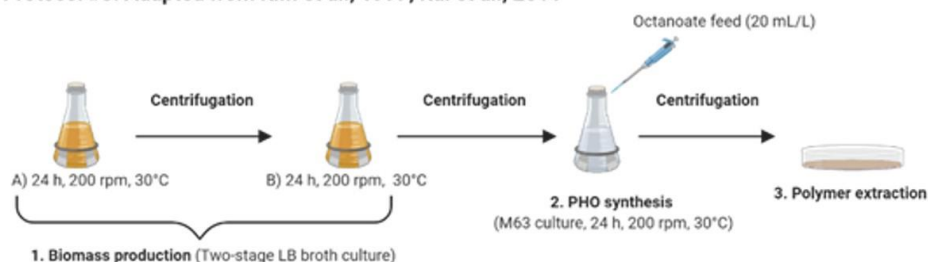

**Protocol #4**

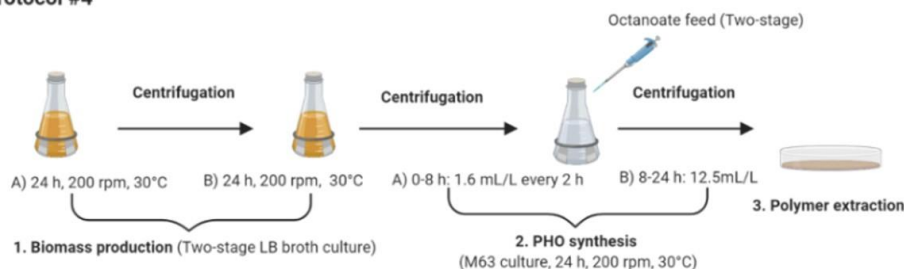

**Protocol #5**

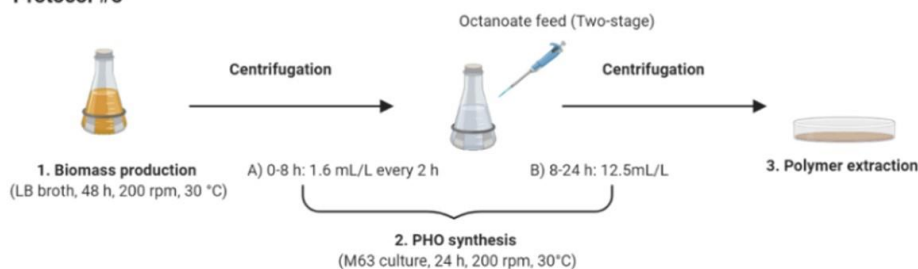

**Figure S2.** Macroscopic aspect of PHO film obtained from *P. putida* KT2440

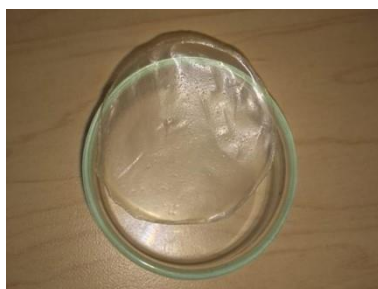

**Figure S3.** FTIR spectra of neat PHO film and active PHO films with different concentrations of metal nanoparticles.

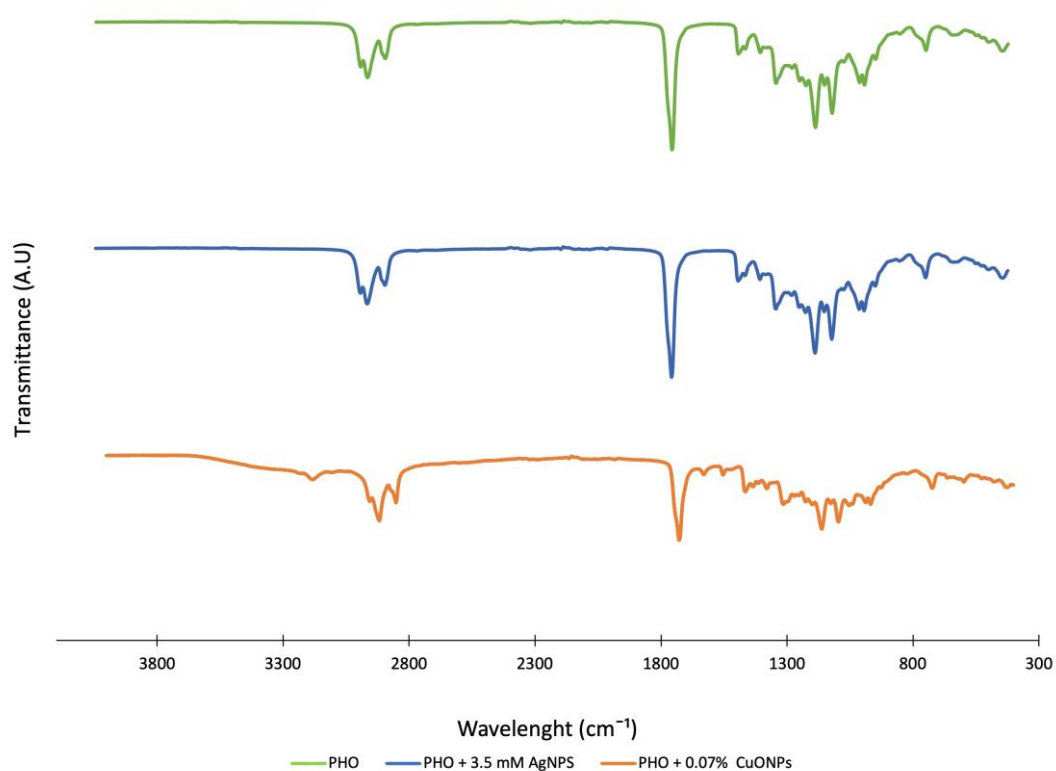

Supplement: s1 [file s1]
